# Supplementary material for: Selection, Identification, and Transcript Expression Analysis of Antioxidant Enzyme Genes in Neoseiulus barkeri after Short-Term Heat Stress
Source: MDPI journal article supplement (doi:10.3390/antiox12111998), 2023-11-13
Supplement: s1 [file s1]

**Table S2.** The primers used for RT-qPCR of four antioxidant genes.

| Gene ID    | Primer Name | Sequence (5'-3')     |
|------------|-------------|----------------------|
| KX505994.1 | SOD-F       | CTCTCTAAAGCCCTCGCTCG |
| KX505994.1 | SOD-R       | GCGATCTGTGCGTTGACATC |
| OR597505   | CAT-F       | ACTTCGCTGAGGTGGAACAG |
| OR597505   | CAT-R       | GAACAGACGTCCTTGGAGCA |
| OR597506   | POD-F       | GGACCGCTGAATCTTGGTGA |
| OR597506   | POD-R       | TGGAACATGAACTCGCCCTC |
| OR597507   | GPX-F       | TCAAGGAGTTCTGCTCGCTG |
| OR597507   | GPX-R       | TGTCGACGAGGAACTTGGTG |
