# Supplementary material for: Selection, Identification, and Transcript Expression Analysis of Antioxidant Enzyme Genes in Neoseiulus barkeri after Short-Term Heat Stress
Source: MDPI journal article supplement (doi:10.3390/antiox12111998), 2023-11-13
Supplement: s1 [file s1]

**Table S4 The Unigene annotation**

| <b>Values</b> | <b>Number</b> | <b>Percentage</b> |
|---------------|---------------|-------------------|
| Total         | 37,379        | 100%              |
| NR            | 21,954        | 58.73%            |
| NT            | 8,951         | 23.95%            |
| Swissprot     | 13,462        | 36.01%            |
| KEGG          | 16,044        | 42.92%            |
| KOG           | 12,968        | 34.69%            |
| Pfam          | 15,042        | 40.24%            |
| GO            | 11,039        | 29.53%            |
| Intersection  | 3,046         | 8.15%             |
| Overall       | 23,893        | 63.92%            |
