# Supplementary material for: Selection, Identification, and Transcript Expression Analysis of Antioxidant Enzyme Genes in Neoseiulus barkeri after Short-Term Heat Stress
Source: MDPI journal article supplement (doi:10.3390/antiox12111998), 2023-11-13
Supplement: s1 [file s1]

**Table S4.** The analysis of the similarity and identity of four antioxidant genes with other species.

| Gene name | Species                          | Accession number | Similarity (%) | Identity (%) |
|-----------|----------------------------------|------------------|----------------|--------------|
| NbSOD     | <i>Galendromus occidentalis</i>  | XP_003742534.1   | 99%            | 93.95%       |
|           | <i>Varroa destructor</i>         | XP_022653269.1   | 99%            | 81.78%       |
|           | <i>Tropilaelaps mercedesae</i>   | OQR70423.1       | 99%            | 79.53%       |
|           | <i>Armadillidium vulgare</i>     | RXG70665.1       | 91%            | 76.14%       |
|           | <i>Penaeus chinensis</i>         | XP_047497250.1   | 91%            | 76.14%       |
|           | <i>Cryptotermes secundus</i>     |                  | 91%            | 75.76%       |
| NbPOD     | <i>Galendromus occidentalis</i>  | XP_003748229.1   | 96%            | 96.30%       |
|           | <i>Varroa destructor</i>         | XP_022659000.1   | 95%            |              |
|           | <i>Tropilaelaps mercedesae</i>   | OQR78265.1       | 96%            | 87.96%       |
|           |                                  | ABR23497.1       | 82%            | 84.41%       |
|           |                                  | XP_029849042.1   | 96%            | 83.33%       |
| NbCAT     |                                  | BAB17604.1       | 96%            | 81.57%       |
|           | <i>Galendromus occidentalis</i>  | XP_018495283.1   | 99%            | 93.60%       |
|           | <i>Tropilaelaps mercedesae</i>   | OQR77713.1       | 99%            | 86.06%       |
|           | <i>Varroa destructor</i>         | XP_022661621.1   | 99%            | 84.20%       |
|           | <i>Eriocheir sinensis</i>        | XP_050722477.1   | 93%            | 74.42%       |
|           | <i>Nephila pilipes</i>           | GFS37677.1       | 98%            | 73.99%       |
| NbGPX     | <i>Trichonephila clavata</i>     | GFQ71175.1       | 97%            | 73.78%       |
|           | <i>Crassostrea gigas</i>         | XP_034312380.1   | 93%            | 68.79%       |
|           | <i>Crassostrea angulata</i>      | XP_052686427.1   | 93%            | 68.79%       |
|           | <i>Ostrea edulis</i>             | XP_048758528.1   | 95%            | 68.55%       |
|           | <i>Burkholderiales bacterium</i> | MCC2626238.1     | 95%            | 68.35%       |
|           | <i>Crassostrea virginica</i>     | XP_022316619.1   | 95%            | 67.30%       |
|           | <i>Panacagrimonas perspica</i>   | WP_133883707.1   | 94%            | 66.88%       |
