# Supplementary material for: Selection, Identification, and Transcript Expression Analysis of Antioxidant Enzyme Genes in Neoseiulus barkeri after Short-Term Heat Stress
Source: MDPI journal article supplement (doi:10.3390/antiox12111998), 2023-11-13
Supplement: s1 [file s1]

**Table S1.** The primers used for cloning CDS sequences of four antioxidant genes

| Gene ID    | Primer Name | Sequence (5'-3')      |
|------------|-------------|-----------------------|
| KX505994.1 | SOD-F       | AACTGTCGGCATCGGAGTTC  |
| KX505994.1 | SOD-R       | GCTAAAATGTGACGCCGGAA  |
| OR597505   | POD-F       | ATGGGACCGCTGAATCTTGG  |
| OR597505   | POD-R       | TTAGTCCATGGTGGTACGCAT |
| OR597506   | CAT-F       | TACGTTCGCGTCATCGACTT  |
| OR597506   | CAT-R       | TTCTCACCAACAGTGGGAGC  |
| OR597507   | GPX-F       | TTCGCTGTAACGATGGCTGT  |
| OR597507   | GPX-R       | TCGCGTTTTCCCTCGTGTA   |
