# Supplementary material for: Selection, Identification, and Transcript Expression Analysis of Antioxidant Enzyme Genes in Neoseiulus barkeri after Short-Term Heat Stress
Source: Antioxidants (Basel). 2023 Nov 13;12(11):1998. doi: 10.3390/antiox12111998 (PMC10669032; doi:10.3390/antiox12111998)
Supplement: Supplementary file 1 [file antioxidants-12-01998-s001.zip › Table S3.xlsx]

## Sheet: Sheet1
Table S3 The transcriptome information
Sample	Total Number	Total Length(nt)	Mean Length(nt)	N50	N70	N90	GC(%)
control_1	22214	24343296	1095	2045	1293	455	49.08
control_2,	22886	26608820	1162	2168	1390	495	49.23
control_3	21929	20216672	921	1666	1049	367	49.04
treat_1	18701	17588052	940	1629	1089	410	48.73
treat_2	21076	20844174	989	1749	1158	417	48.9
treat_3	20401	21486205	1053	1868	1239	456	48.97
All-Unigene	37379	35395678	946	1955	1118	340	49.16
