# Supplementary material for: Selection, Identification, and Transcript Expression Analysis of Antioxidant Enzyme Genes in Neoseiulus barkeri after Short-Term Heat Stress
Source: Antioxidants (Basel). 2023 Nov 13;12(11):1998. doi: 10.3390/antiox12111998 (PMC10669032; doi:10.3390/antiox12111998)
Supplement: Supplementary file 1 [file antioxidants-12-01998-s001.zip › Table S6.xlsx]

## Sheet: NbSOD
Table S6 The CT values of RT-qPCR in NbSOD
	CT1	CT2	CT3
CK	25.28	24.73	25.55
36℃-2h	24.12	24.29	25.28
36℃-4h	24.11	24.52	23.7
36℃-6h	22.1	21.56	21.54
38℃-2h	22.49	21.01	21.54
38℃-4h	19.02	19.11	18.83
38℃-6h	20.96	21.1	21.13
40℃-2h	21.09	21.03	21.08
40℃-4h	19.9	19.96	19.86
40℃-6h	21.98	21.97	22.01
β-actin	18.4044	17.2378	17.8522
