# Supplementary material for: Selection, Identification, and Transcript Expression Analysis of Antioxidant Enzyme Genes in Neoseiulus barkeri after Short-Term Heat Stress
Source: Antioxidants (Basel). 2023 Nov 13;12(11):1998. doi: 10.3390/antiox12111998 (PMC10669032; doi:10.3390/antiox12111998)
Supplement: Supplementary file 1 [file antioxidants-12-01998-s001.zip › Table S7.xlsx]

## Sheet: Sheet1
Table S7 The CT values of RT-qPCR in NbPOD
	CT1	CT2	CT3
CK	21.5	21.03	21.12
36℃-2h	21.1	20.94	21.04
36℃-4h	21	21.01	21
36℃-6h	20.25	20.04	20.15
38℃-2h	19.83	20.1	20.02
38℃-4h	20.22	20.2	20.24
38℃-6h	19.97	22.08	19.99
40℃-2h	18.68	18.64	18.79
40℃-4h	18.81	18.78	18.52
40℃-6h	21.14	21.14	21.11
β-actin	18.4044	17.2378	17.8522
