# Supplementary material for: Selection, Identification, and Transcript Expression Analysis of Antioxidant Enzyme Genes in Neoseiulus barkeri after Short-Term Heat Stress
Source: Antioxidants (Basel). 2023 Nov 13;12(11):1998. doi: 10.3390/antiox12111998 (PMC10669032; doi:10.3390/antiox12111998)
Supplement: Supplementary file 1 [file antioxidants-12-01998-s001.zip › Table S8.xlsx]

## Sheet: Sheet1
Table S8 The CT values of RT-qPCR in NbCAT
	CT1	CT2	CT3
CK	20.31	20.79	20.18
36℃-2h	22.13	22.12	22.27
36℃-4h	20.73	20.57	20.74
36℃-6h	19.53	19.47	19.5
38℃-2h	19.02	19.11	18.83
38℃-4h	19.55	19.69	18.9
38℃-6h	19.63	19.72	19.55
40℃-2h	18.47	18.43	18.49
40℃-4h	17.95	17.91	17.98
40℃-6h	19.72	19.64	19.73
β-actin	18.4044	17.2378	17.8522
